# Supplementary material for: Acthaside: a new chromone derivative from Acacia ataxacantha and its biological activities
Source: PubMed Central journal article supplement (PMC5142280; doi:10.1186/s12906-016-1489-y), 2016-12-07

# NMR and MS spectrum of the isolated compound (*Acthaside*)

## <sup>1</sup>H NMR

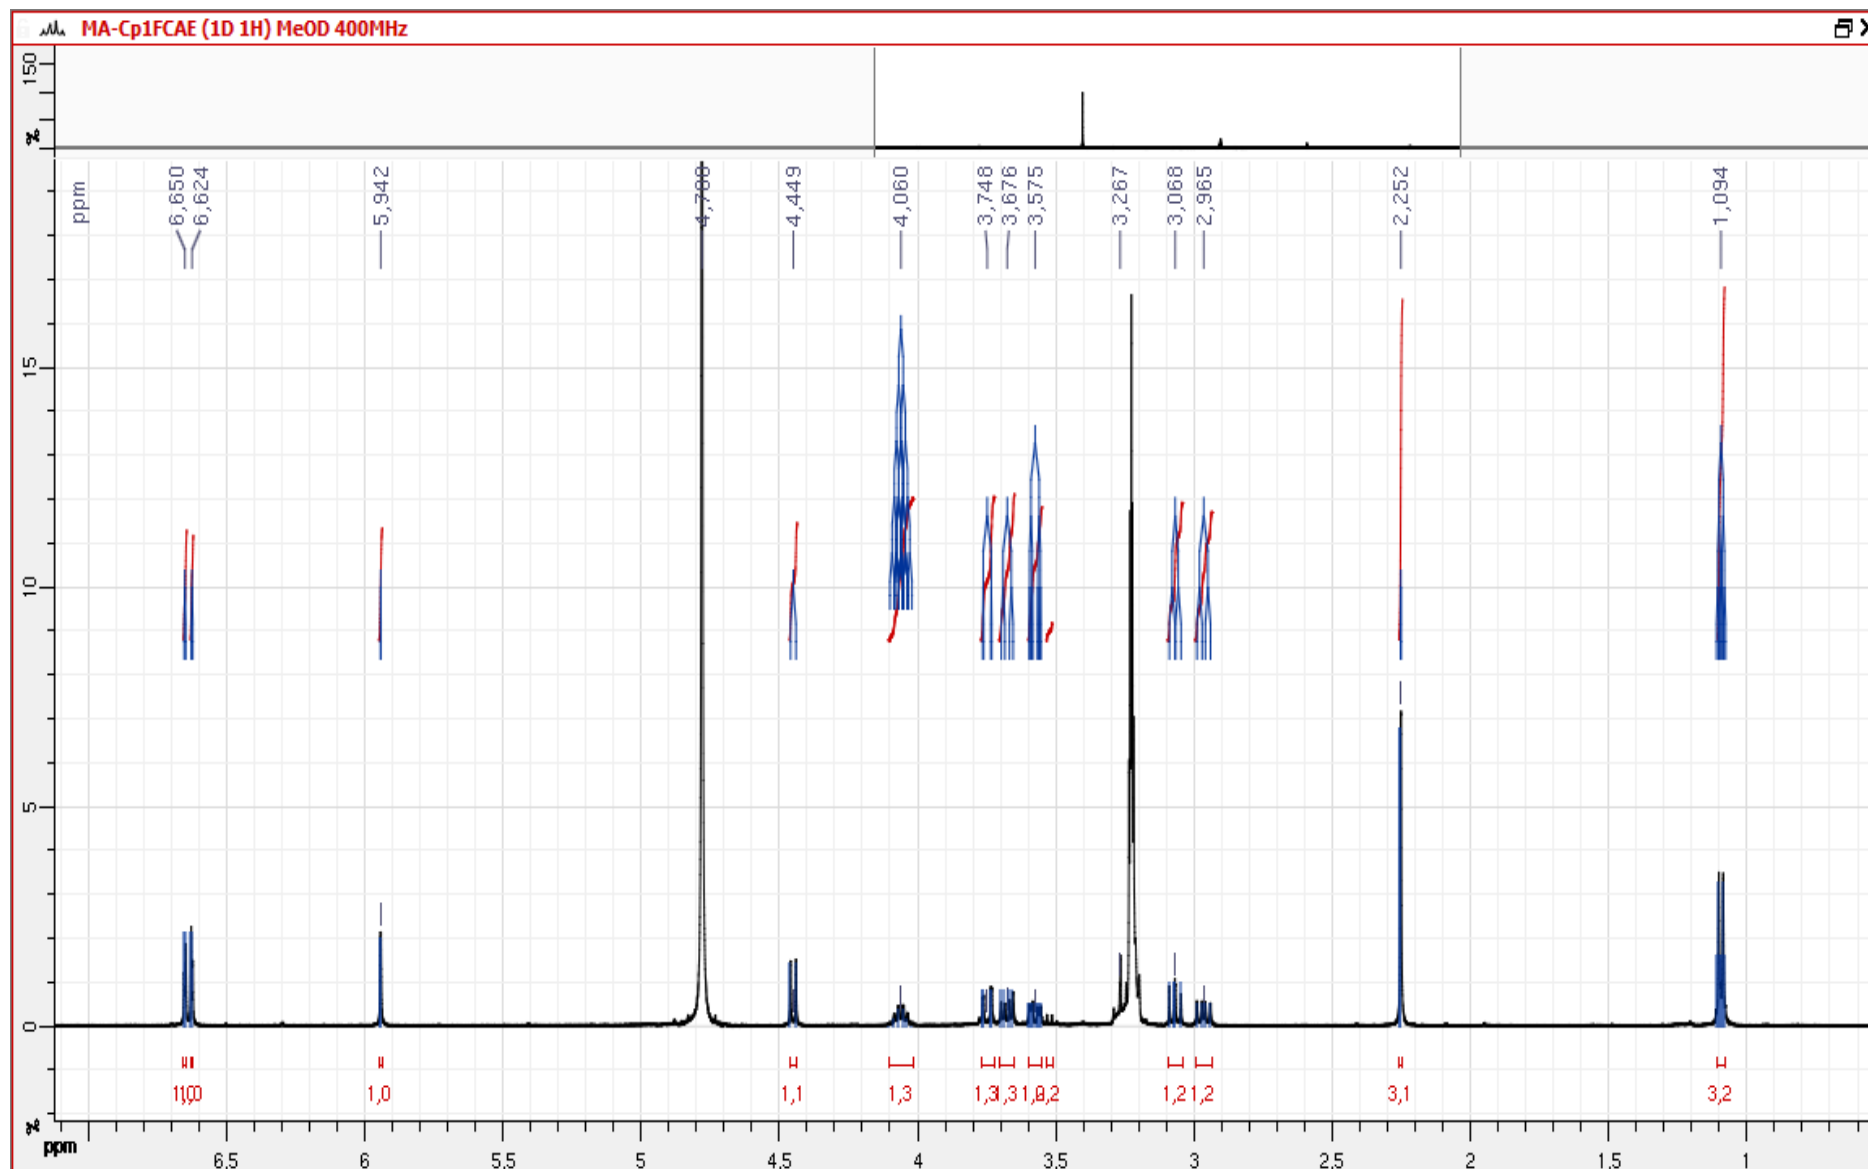

# $^{13}\text{C}$ NMR

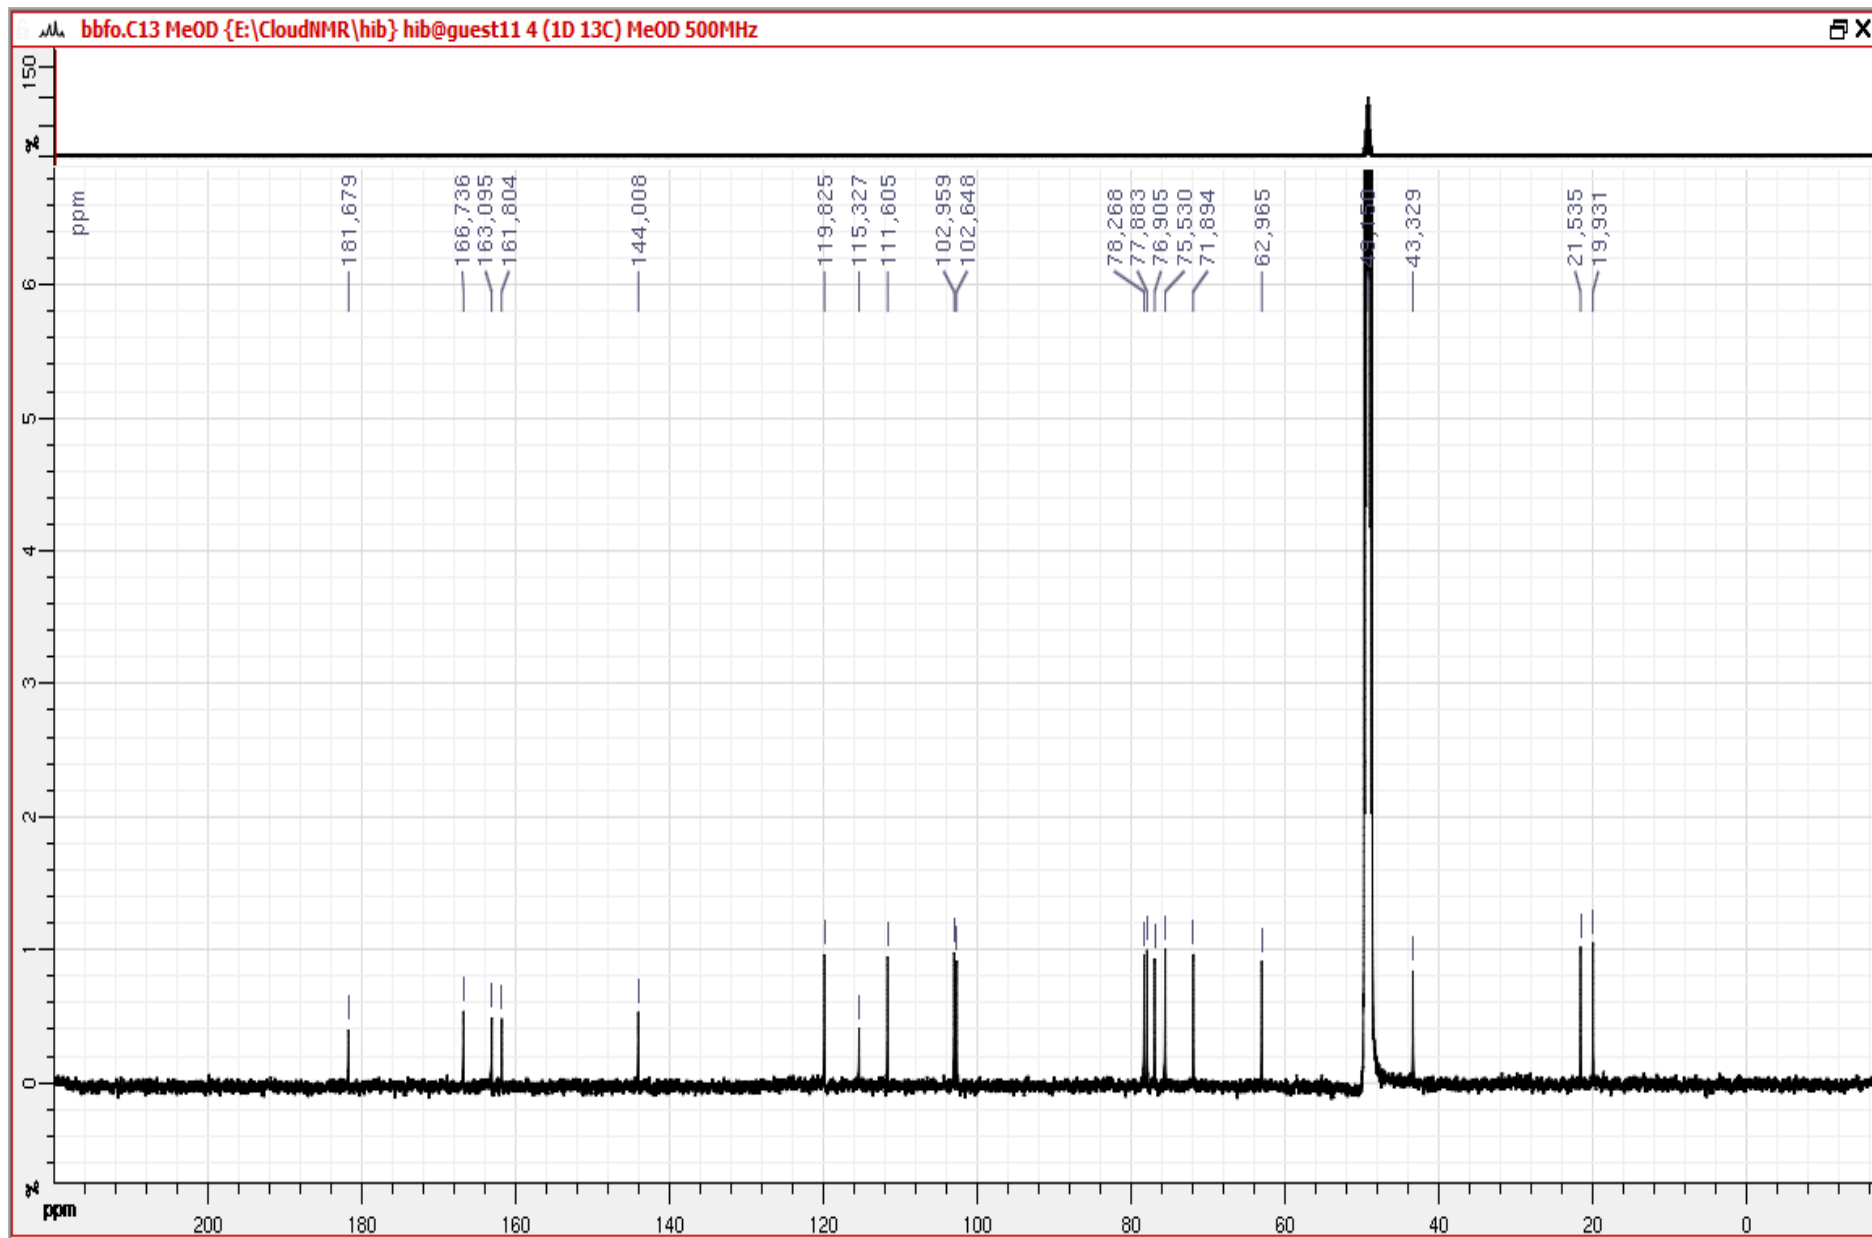

# COSY spectral

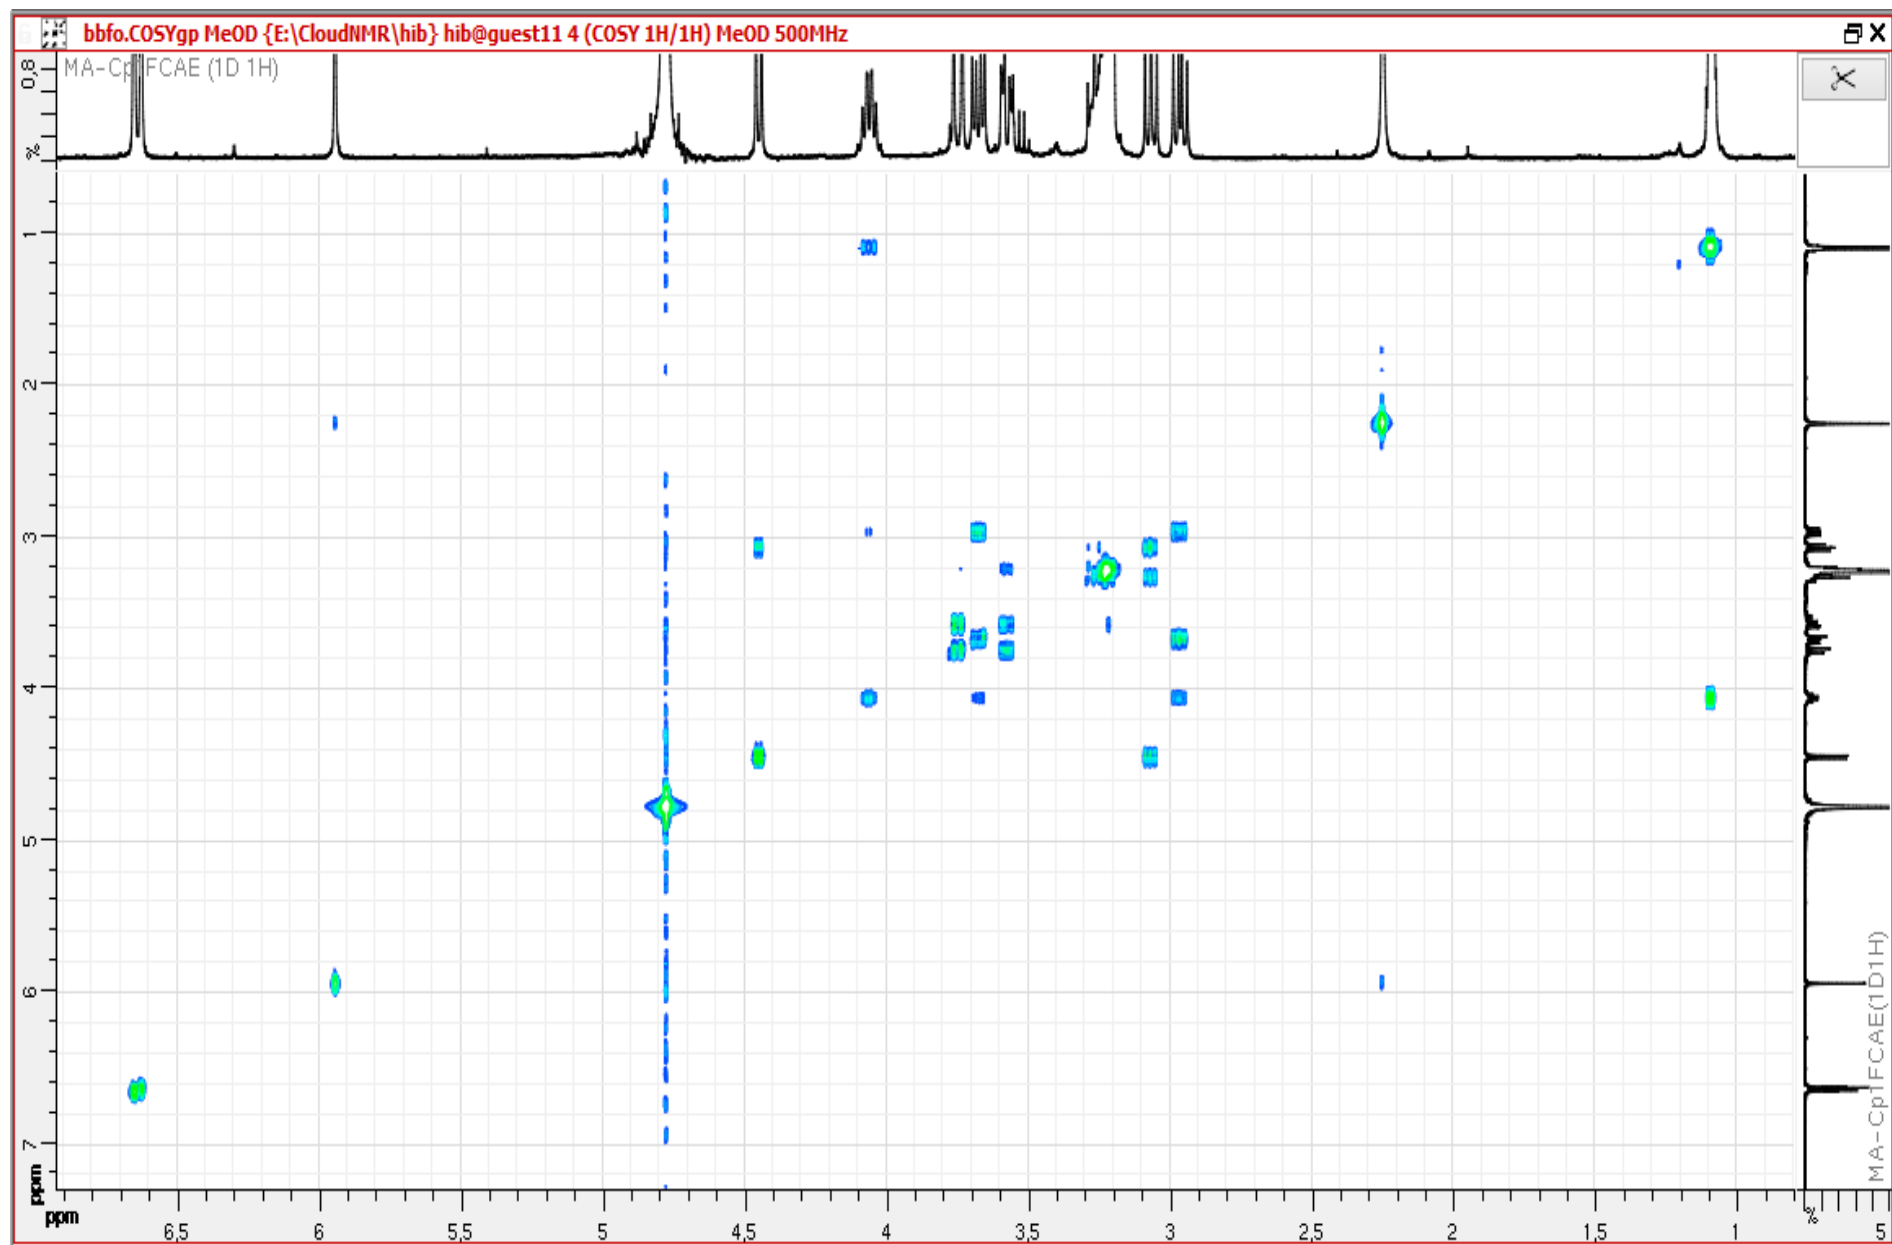

# NOESY spectral

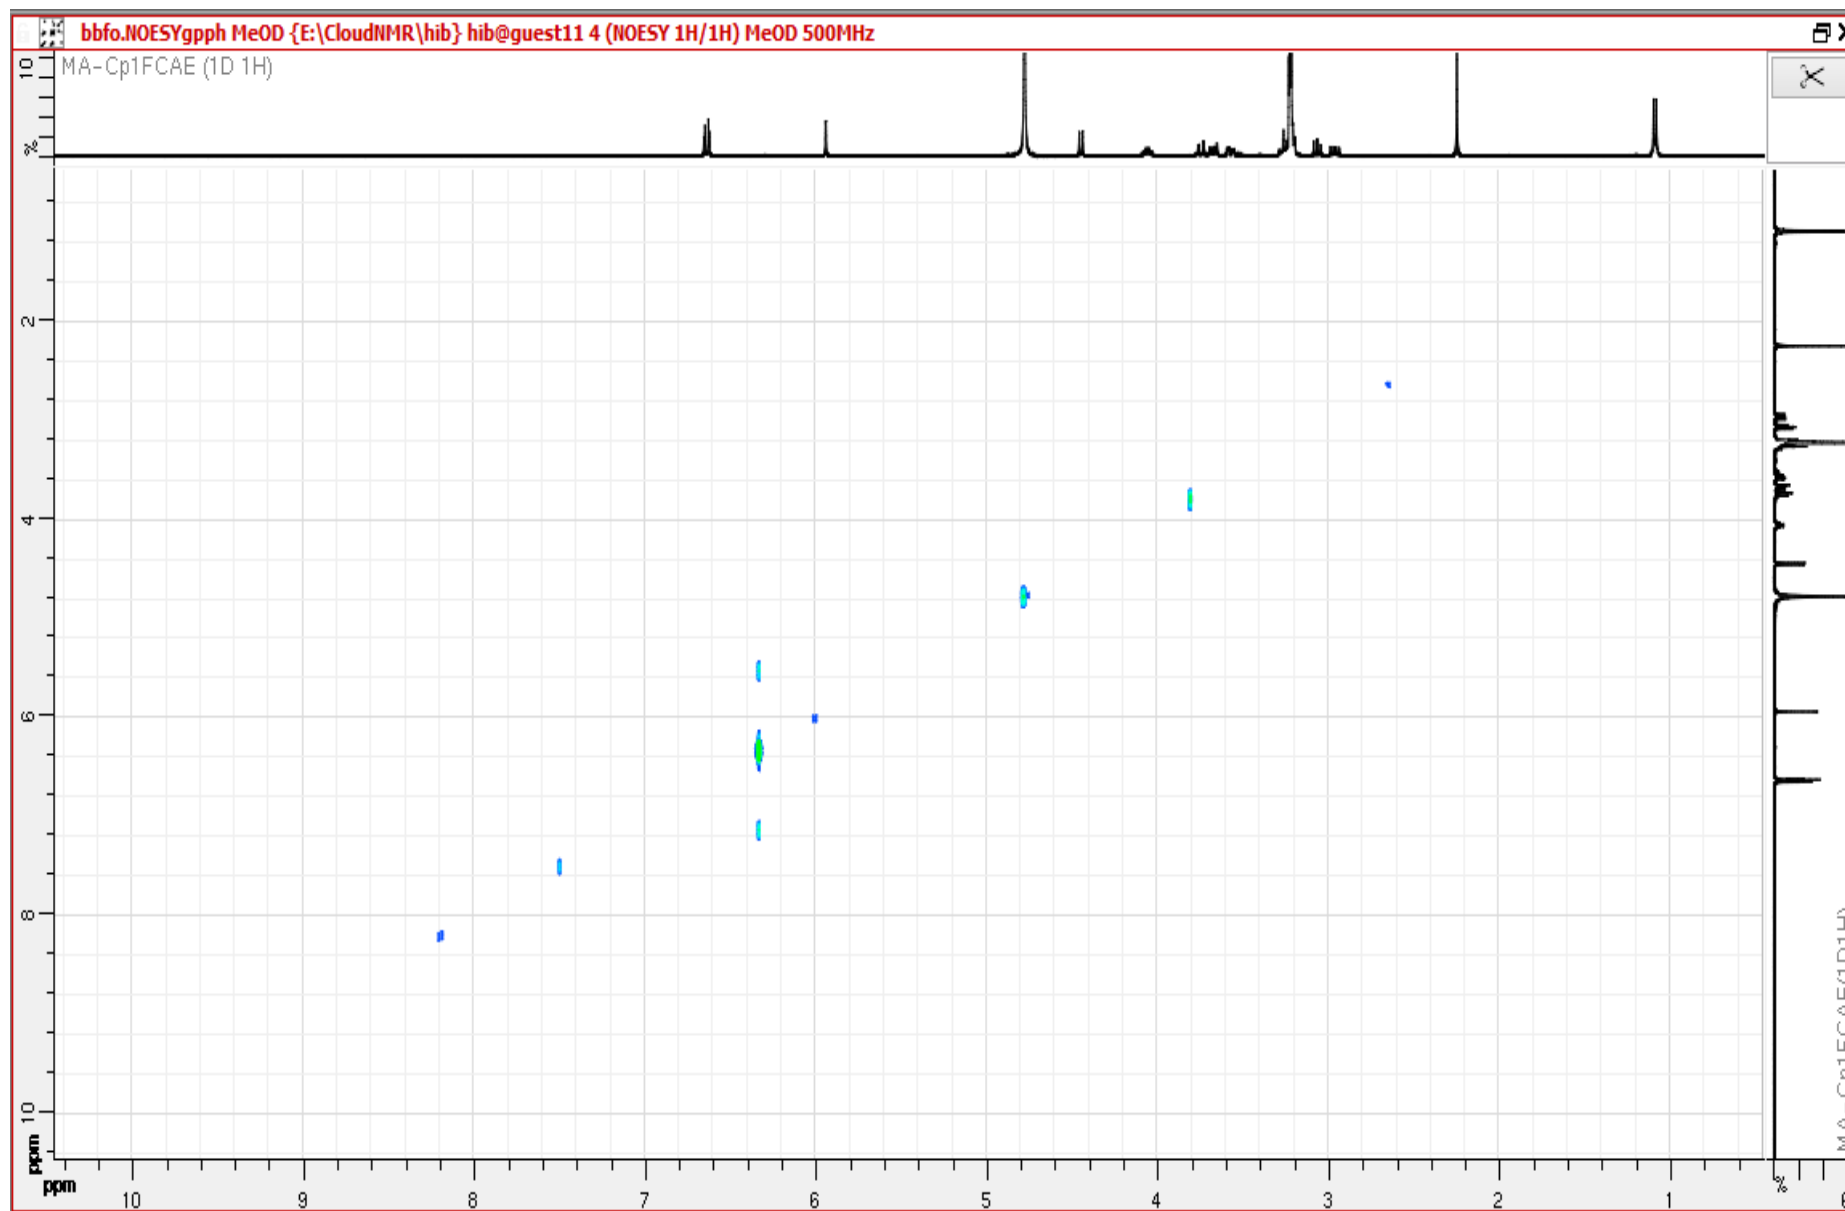

# HSQC spectral

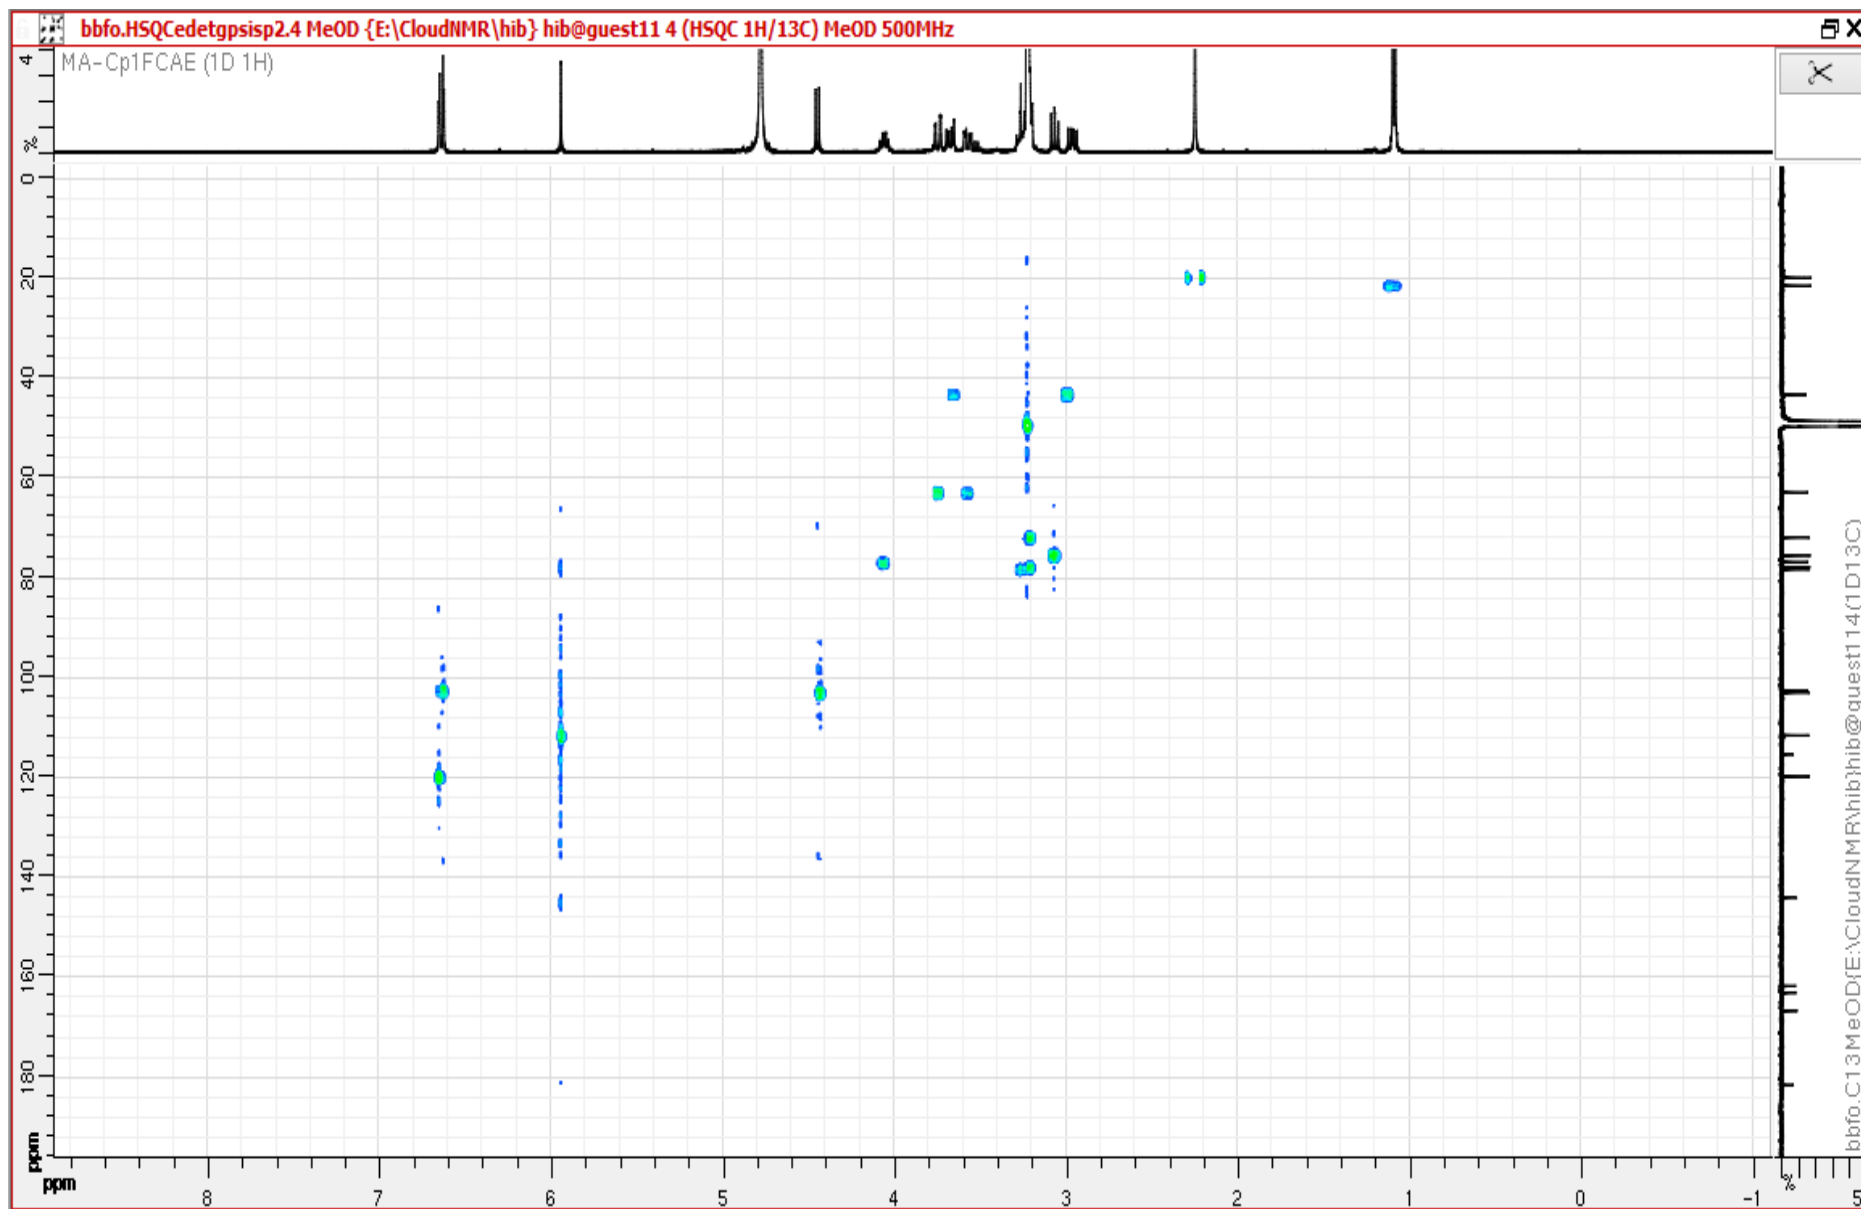

# HMBC spectral

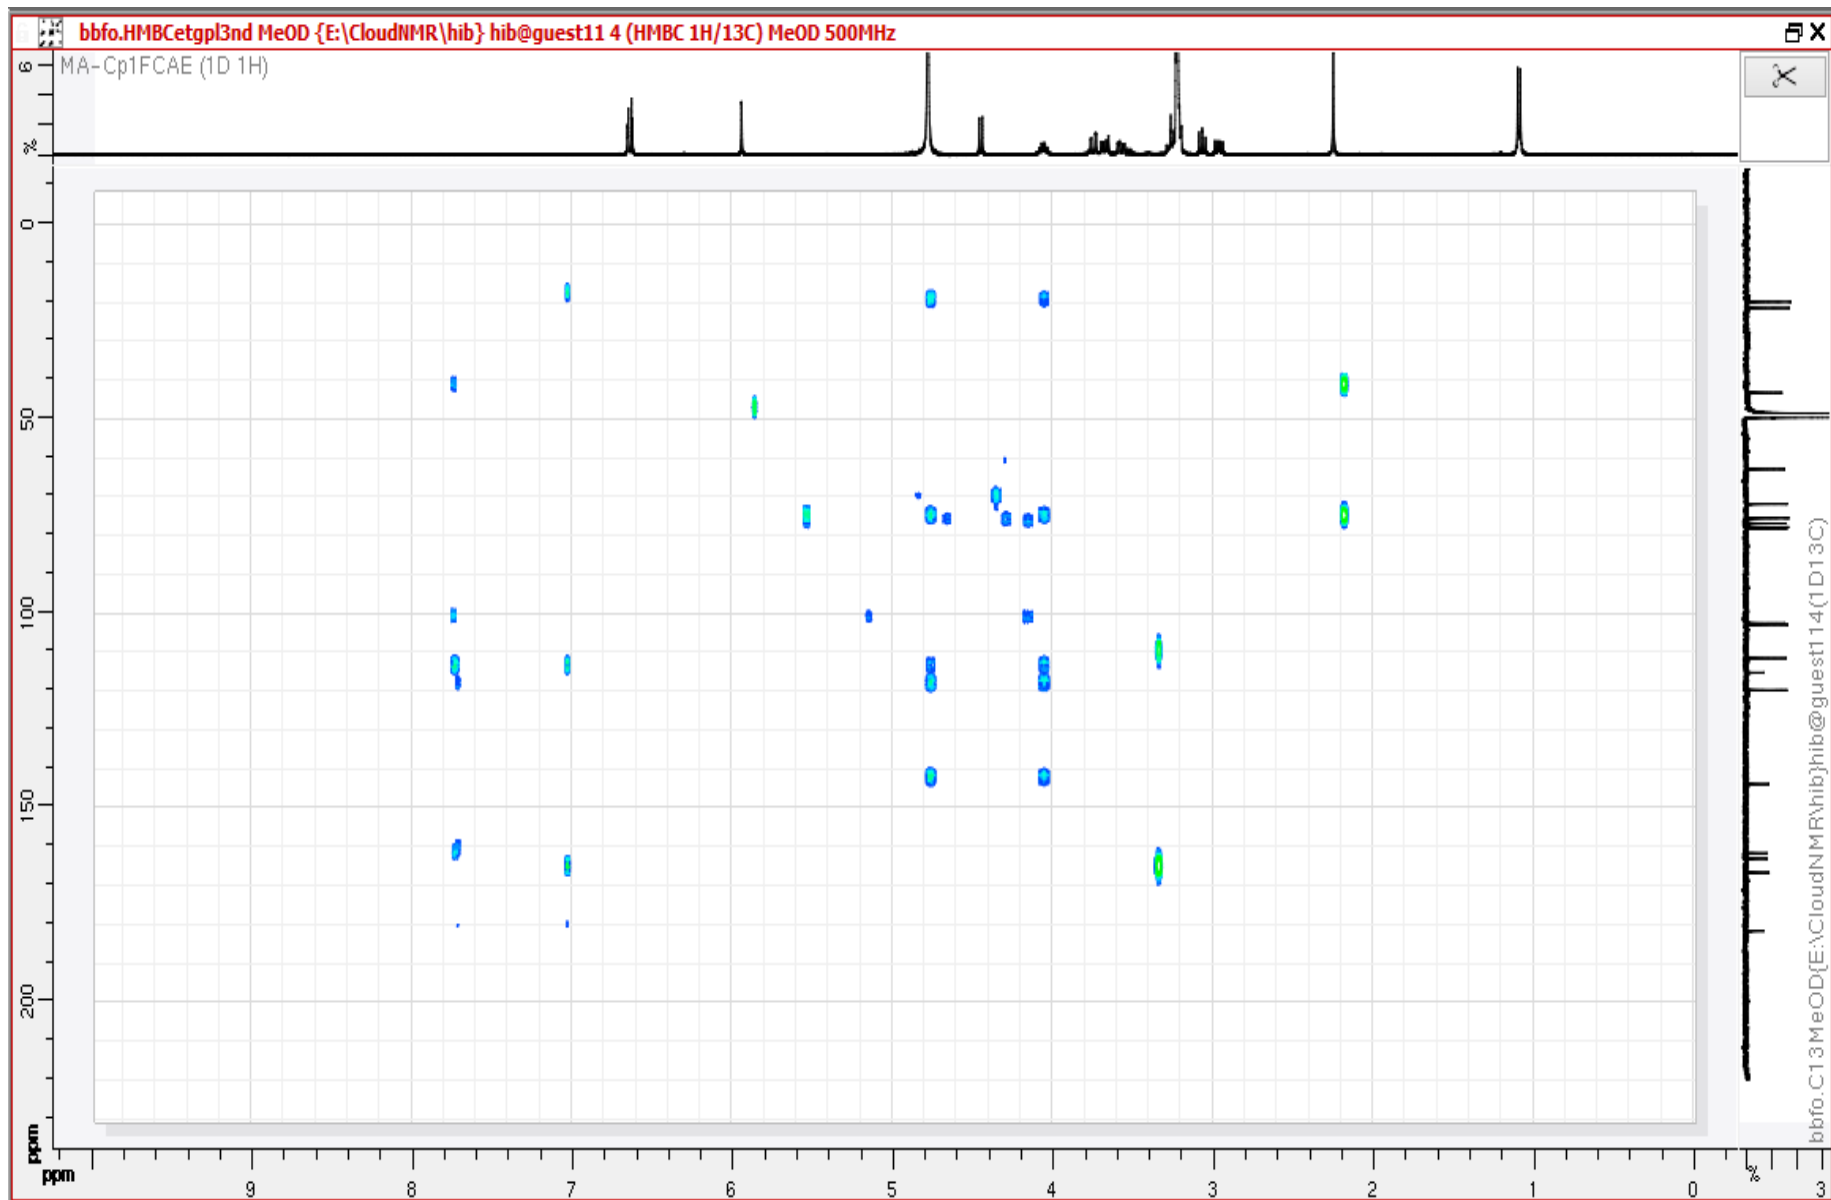

## Qualitative Analysis Report

|                               |                   |                      |                       |
|-------------------------------|-------------------|----------------------|-----------------------|
| <b>Data Filename</b>          | QT09944.d         | <b>Sample Name</b>   | CP1FcAe               |
| <b>Inj. Vol.</b>              | 0.1               | <b>Position</b>      | P1-C3                 |
| <b>Instrument Name</b>        | SCA Illkirch QToF | <b>User Name</b>     | PW                    |
| <b>Acq Method</b>             | C18-2,1x5x1,8.m   | <b>Acquired Time</b> | 2/19/2015 12:09:42 PM |
| <b>IRM Calibration Status</b> | Success           | <b>DA Method</b>     | C18-2,1x5x1,8.m       |
| <b>Comment</b>                |                   |                      |                       |

Sample Group      Info.

### User Chromatograms

Fragmentor Voltage 120    Collision Energy 0    Ionization Mode ESI

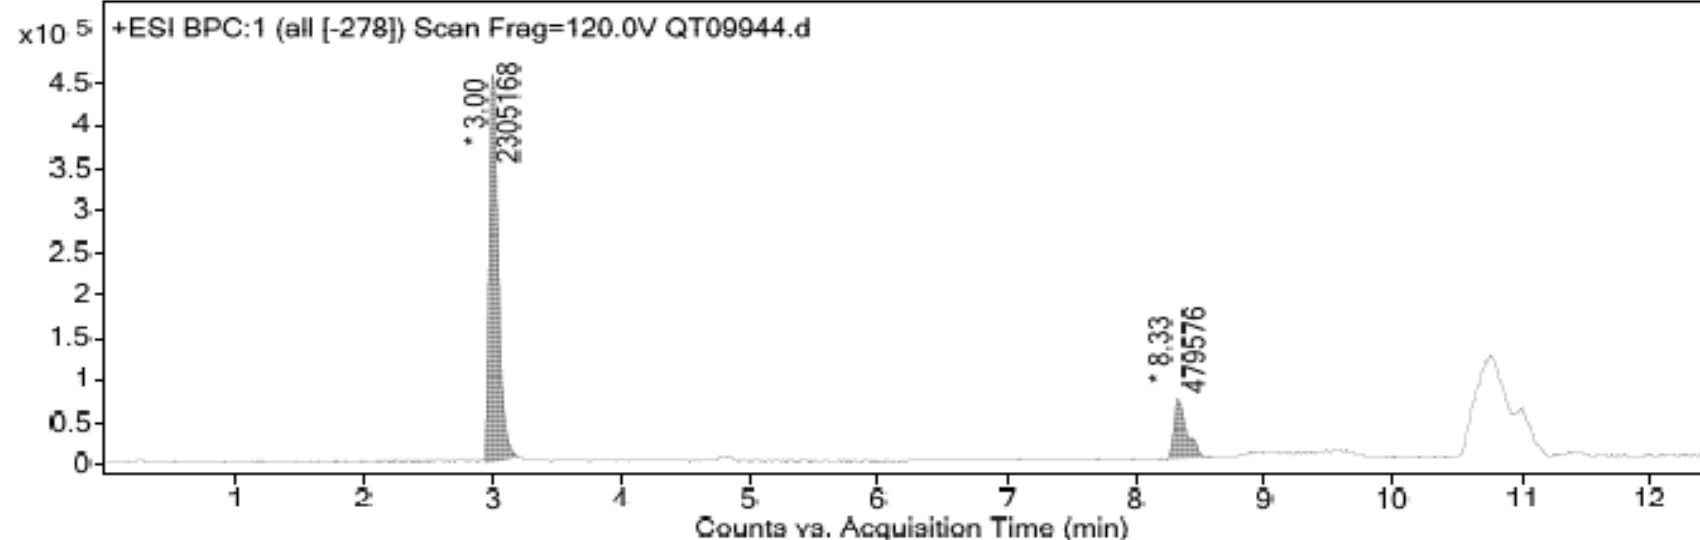

#### Integration Peak List

| Start | RT   | End  | Height | Area    | Area % | AreaSum% |
|-------|------|------|--------|---------|--------|----------|
| 2.94  | 3    | 3.2  | 460053 | 2305168 | 100    | 82.78    |
| 8.24  | 8.33 | 8.57 | 70550  | 479576  | 20.8   | 17.22    |

# Qualitative Analysis Report

Spectrum Source

Peak (1) in "+ BPC:1 (all [-278]) Scan"

Fragmentor Voltage

120

Collision Energy

0

Ionization Mode

ESI

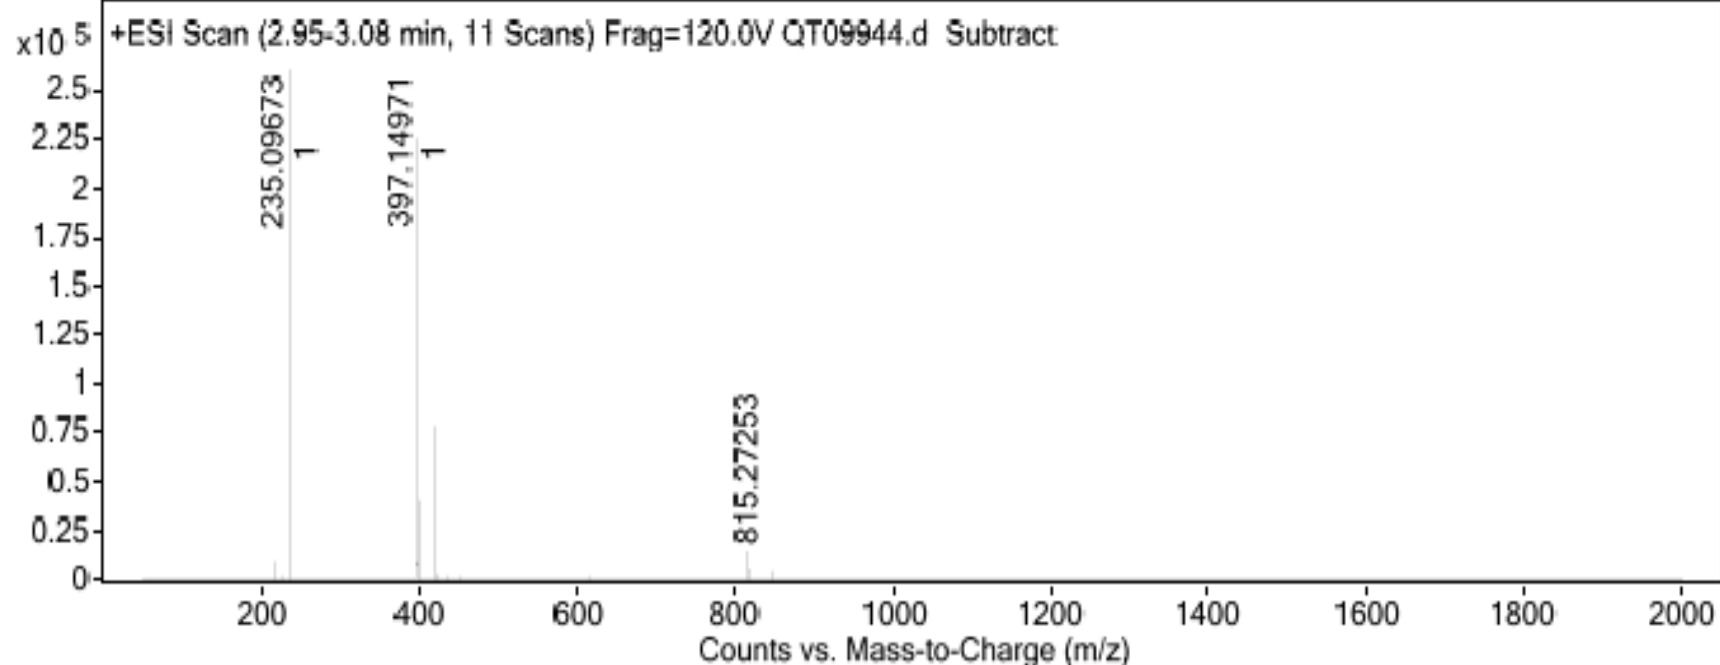

## Peak List

| m/z       | z | Abund    | Formula    | Ion    |
|-----------|---|----------|------------|--------|
| 235.09673 | 1 | 265350.1 | C13 H15 O4 | (M+H)+ |
| 236.09981 | 1 | 29850.1  | C13 H15 O4 | (M+H)+ |
| 397.14971 | 1 | 232350.3 | C19 H25 O9 | (M+H)+ |
| 398.15266 | 1 | 39968.4  | C19 H25 O9 | (M+H)+ |
| 419.13118 |   | 78852.9  |            |        |
| 815.27253 |   | 13898.5  |            |        |



# Qualitative Analysis Report

**Spectrum Source**

Peak (1) In "DAD1 - EWC:5lg=210,8 Ref=520,8

Sub"

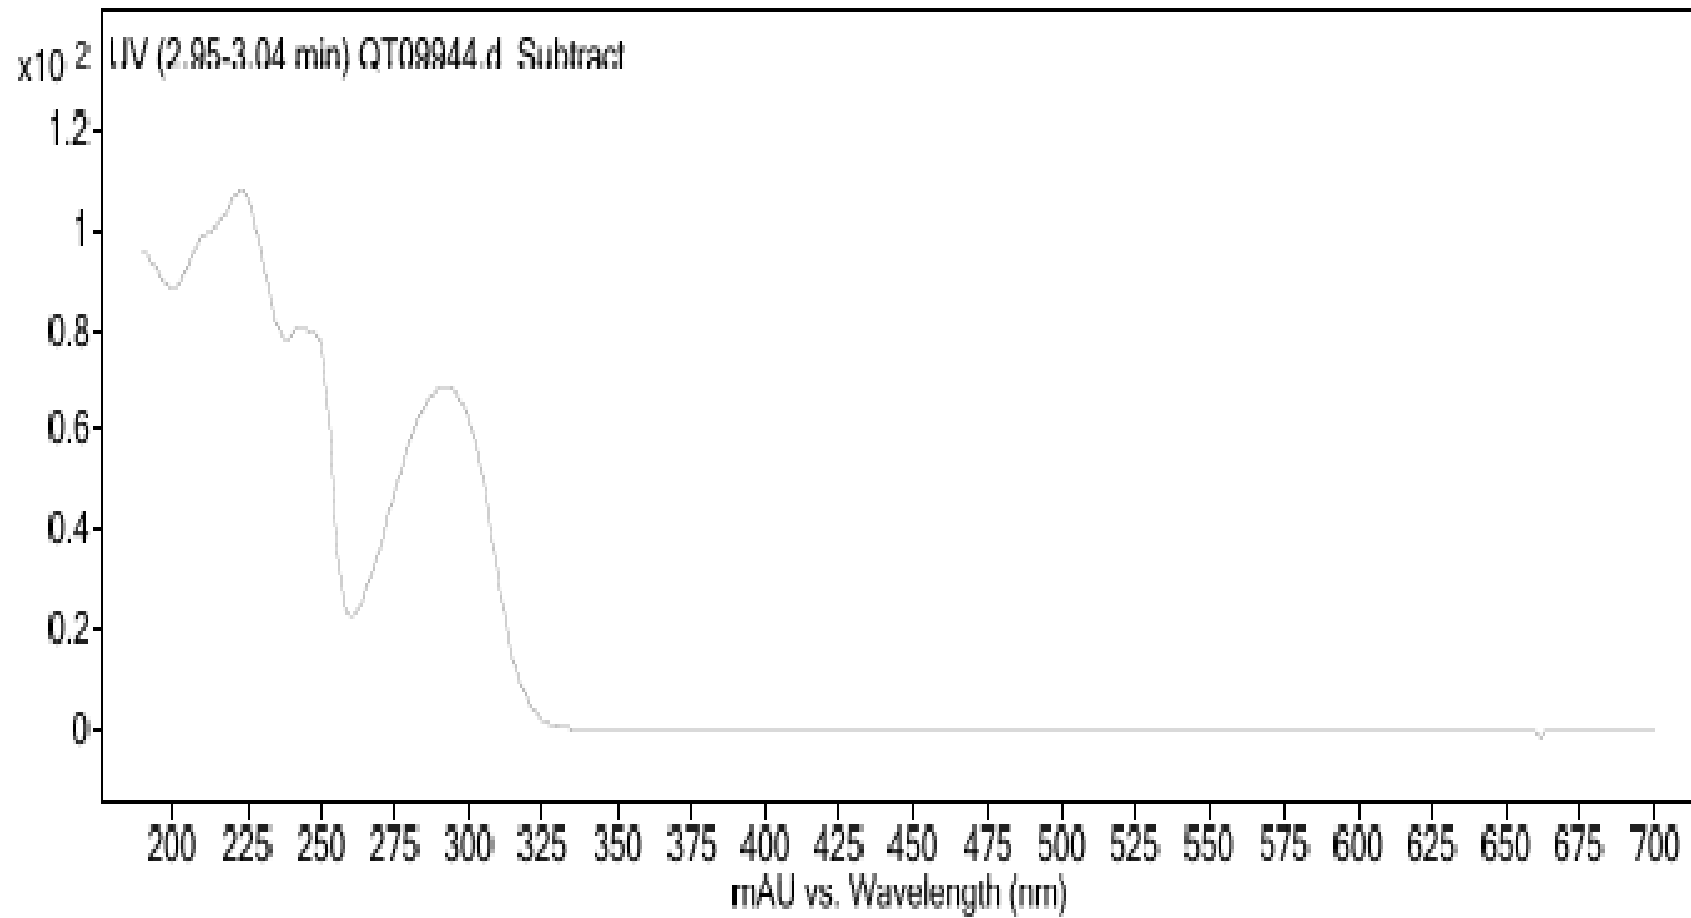

Supplement: 12906_2016_1489_MOESM1_ESM.pdf [file 12906_2016_1489_MOESM1_ESM.pdf]
